# Supplementary material for: Secondary Metabolite Variation and Bioactivities of Two Marine Aspergillus Strains in Static Co-Culture Investigated by Molecular Network Analysis and Multiple Database Mining Based on LC-PDA-MS/MS
Source: MDPI journal article supplement (doi:10.3390/antibiotics11040513), 2022-04-12
Supplement: s1 [file s1]

Supporting information

**Table S1. The table shows the variation of yields presented by peak areas in extracted ion chromatographies for different compounds**

| Feature peak number | retention time (min) | Measured m/z | Sample number | Peak Area    | Peak Area (G1) | Peak Area (G2) | Fold of change relative to G1 | Fold of change relative to G2 |
|---------------------|----------------------|--------------|---------------|--------------|----------------|----------------|-------------------------------|-------------------------------|
| 1                   | 1.67                 | 309.22       | G3            | 3620879.16   |                | 26648277.63    |                               | 0.14                          |
|                     |                      |              | G4            | 91154.56     |                |                |                               | 0.003                         |
|                     |                      |              | G5            | 593781.99    |                |                |                               | 0.02                          |
|                     |                      |              | G6            | 3522067.80   |                |                |                               | 0.13                          |
|                     |                      |              | G7            | 42188129.38  |                |                |                               | 1.58                          |
| 2                   | 2.87                 | 679.59       | G3            | 76840701.24  | 16795830.12    | 48463830.52    | 4.57                          | 1.59                          |
|                     |                      |              | G4            | 95111091.56  |                |                | 5.66                          | 1.96                          |
|                     |                      |              | G5            | 102023265    |                |                | 6.07                          | 2.11                          |
|                     |                      |              | G6            | 108378583.96 |                |                | 6.45                          | 2.24                          |
|                     |                      |              | G7            | 119161695.9  |                |                | 7.09                          | 2.46                          |
| 3                   | 6.40                 | 777.38       | G3            | 1036727.8    | 20606542.49    |                | 0.05                          |                               |
|                     |                      |              | G4            | 71272594.05  |                |                | 3.46                          |                               |
|                     |                      |              | G5            | 63453608.16  |                |                | 3.08                          |                               |
|                     |                      |              | G6            | 63582.77     |                |                | 0.003                         |                               |
|                     |                      |              | G7            | 212056.87    |                |                | 0.01                          |                               |
| 4                   | 7.81                 | 759.36       | G3            | 1134190770   | 310976824.6    |                | 3.65                          |                               |
|                     |                      |              | G4            | 1080810291   |                |                | 3.48                          |                               |
|                     |                      |              | G5            | 241975956.4  |                |                | 0.78                          |                               |
|                     |                      |              | G6            | 28846488.59  |                |                | 0.09                          |                               |
|                     |                      |              | G7            | 42799803.06  |                |                | 0.14                          |                               |
| 5                   | 9.30                 | 585.27       | G3            | 3378519.33   |                | 14854340.28    |                               | 0.23                          |
|                     |                      |              | G4            | 224474.64    |                |                |                               | 0.02                          |
|                     |                      |              | G5            | 1153568.02   |                |                |                               | 0.08                          |
|                     |                      |              | G6            | 22146070.5   |                |                |                               | 1.49                          |
|                     |                      |              | G7            | 51847648.84  |                |                |                               | 3.49                          |
| 6                   | 9.99                 | 527.22       | G3            | 8962482.13   |                | 74552422.41    |                               | 0.12                          |
|                     |                      |              | G4            | 564095.35    |                |                |                               | 0.008                         |
|                     |                      |              | G5            | 8183279.55   |                |                |                               | 0.11                          |
|                     |                      |              | G6            | 52275649.97  |                |                |                               | 0.70                          |
|                     |                      |              | G7            | 53901881.61  |                |                |                               | 0.72                          |
| 7                   | 11.80                | 427.26       | G3            | 4847851.665  |                | 22709063.8     |                               | 0.21                          |
|                     |                      |              | G4            | 1764481.85   |                |                |                               | 0.08                          |
|                     |                      |              | G5            | 81082898.13  |                |                |                               | 3.57                          |
|                     |                      |              | G6            | 71445604.45  |                |                |                               | 3.15                          |
|                     |                      |              | G7            | 100354050.6  |                |                |                               | 4.42                          |
| 8                   | 12.15                | 459.31       | G3            | 4708411.63   |                | 9102325.84     |                               | 0.52                          |
|                     |                      |              | G4            | 1764481.85   |                |                |                               | 0.19                          |

Table S1. Cont.

| Feature peak number | Representative retention time (min) | Measured m/z | Sample number | Peak Area   | Peak Area (G1) | Peak Area (G2) | Fold of change relative to G1 | Fold of change relative to G2 |
|---------------------|-------------------------------------|--------------|---------------|-------------|----------------|----------------|-------------------------------|-------------------------------|
| 8                   | 12.15                               | 459.31       | G5            | 76557496.58 |                | 9102325.84     |                               | 8.41                          |
|                     |                                     |              | G6            | 66539257.66 |                |                |                               | 7.31                          |
|                     |                                     |              | G7            | 95320100.59 |                |                |                               | 10.47                         |
| 9                   | 16.26                               | 507.38       | G3            | 1297253.48  |                | 81381822.13    |                               | 0.02                          |
|                     |                                     |              | G4            | 4669779.11  |                |                |                               | 0.06                          |
|                     |                                     |              | G5            | 235174.36   |                |                |                               | 0.003                         |
|                     |                                     |              | G6            | 6355606.81  |                |                |                               | 0.08                          |
|                     |                                     |              | G7            | 4378939.5   |                |                |                               | 0.05                          |
| 10                  | 17.78                               | 1106.49      | G3            | 114851.45   |                | 114851448.1    |                               | 0.001                         |
|                     |                                     |              | G4            | 344554.34   |                |                |                               | 0.003                         |
|                     |                                     |              | G5            | 10336630.33 |                |                |                               | 0.09                          |
|                     |                                     |              | G6            | 73504926.81 |                |                |                               | 0.64                          |
|                     |                                     |              | G7            | 156197969.5 |                |                |                               | 1.36                          |
| 11                  | 18.20                               | 1135.35      | G3            | 701798.51   |                | 35089925.51    |                               | 0.02                          |
|                     |                                     |              | G4            | 1403597.02  |                |                |                               | 0.04                          |
|                     |                                     |              | G5            | 18246761.27 |                |                |                               | 0.52                          |
|                     |                                     |              | G6            | 46669600.93 |                |                |                               | 1.33                          |
|                     |                                     |              | G7            | 106322474.3 |                |                |                               | 3.03                          |
| 12                  | 2.16                                | 606.07       | G3            | 895722.73   |                | 4478613.63     |                               | 0.2                           |
|                     |                                     |              | G4            | 268716.82   |                |                |                               | 0.06                          |
|                     |                                     |              | G5            | 358289.09   |                |                |                               | 0.08                          |
|                     |                                     |              | G6            | 89572.27    |                |                |                               | 0.02                          |
|                     |                                     |              | G7            | 2552809.77  |                |                |                               | 0.57                          |
| 13                  | 8.87                                | 362.92       | G3            | 21748.05    |                | 724935.03      |                               | 0.03                          |
|                     |                                     |              | G4            | 14498.70    |                |                |                               | 0.02                          |
|                     |                                     |              | G5            | 101490.90   |                |                |                               | 0.14                          |
|                     |                                     |              | G6            | 195732.46   |                |                |                               | 0.27                          |
|                     |                                     |              | G7            | 659690.88   |                |                |                               | 0.91                          |
| 14                  | 11.54                               | 367.19       | G3            | 0           | 0              |                | 0                             |                               |
|                     |                                     |              | G4            | 0           |                |                | 0                             |                               |
|                     |                                     |              | G5            | 47459.20    |                |                | 1 (/ G5)                      |                               |
|                     |                                     |              | G6            | 635478.69   |                |                | 13.39 (/ G5)                  |                               |
|                     |                                     |              | G7            | 89697.89    |                |                | 1.89 (/ G5)                   |                               |
| 15                  | 13.50                               | 441.07       | G3            | 987377.37   | 4292945.09     |                |                               | 0.23                          |
|                     |                                     |              | G4            | 2404049.25  |                |                |                               | 0.56                          |
|                     |                                     |              | G5            | 2146472.55  |                |                |                               | 0.5                           |
|                     |                                     |              | G6            | 601012.31   |                |                |                               | 0.14                          |
|                     |                                     |              | G7            | 0           |                |                |                               | 0                             |

**Table S2: Multiple database mining for the peaks without remarkable yield changes in LC-MS traces between axenic and co-cultures while annotated by GNPS matching**

| Sample #       | m/z measured              | Mean retention time (min) | UV maximum measured (nm) | Compound name                                                   | Molecular weight in Libraries | Library & ID                     | MS <sup>2</sup> similarity (cosine) | Molecular Formula                                               | UV maximum in libraries/ literature (nm) | Bioresource                         | DOI                                                         | Biological activity                                                                                                                        | SMILES code                                                                           |
|----------------|---------------------------|---------------------------|--------------------------|-----------------------------------------------------------------|-------------------------------|----------------------------------|-------------------------------------|-----------------------------------------------------------------|------------------------------------------|-------------------------------------|-------------------------------------------------------------|--------------------------------------------------------------------------------------------------------------------------------------------|---------------------------------------------------------------------------------------|
| G3, G5, G6, G7 | 261.15 [M+H] <sup>+</sup> | 2.38                      | 231                      | cyclo-(Leu-Phe)                                                 | 260.32                        | GNPS,CCMSLIB00000081165          | 0.86                                | C <sub>15</sub> H <sub>20</sub> N <sub>2</sub> O <sub>2</sub>   | 260,204,169,141,113,91                   | <i>Streptomyces albulus KO-23.</i>  | 10.7164/antibiotics.53.58                                   | N/A                                                                                                                                        | O=C(NC1CC(C)C)C(CC2=CC=CC=C2)NC1=O                                                    |
|                |                           |                           |                          | cyclo-(Leu-Phe);3-benzyl-6-(2-methylpropyl)piperazine-2,5-dione | 260.32                        | Pubchem, 562691                  | N/A                                 | C <sub>15</sub> H <sub>20</sub> N <sub>2</sub> O <sub>2</sub>   | 260,204,169,141,113,91                   | <i>Streptomyces albulus KO-23.</i>  | 10.7164/antibiotics.53.58                                   | N/A                                                                                                                                        | CC(C)CC1C(=O)NC(C(=O)N1)CC2=CC=CC=C2                                                  |
|                |                           |                           |                          | Aspiperidine oxide                                              | 260.33                        | Dictionary of Natural Products   | N/A                                 | C <sub>15</sub> H <sub>20</sub> N <sub>2</sub> O <sub>2</sub>   | 273                                      | <i>Aspergillus indologenus</i>      | 10.1016/j.tetlet.2015.02.082                                | no biological activity was found.                                                                                                          | C[N+](CCCCC1C(=O)NC=CC2=CC=C(C=C2)[O-])                                               |
|                |                           |                           |                          | Biotin S-Oxide                                                  | 260.31                        |                                  | N/A                                 | C <sub>10</sub> H <sub>16</sub> N <sub>2</sub> O <sub>4</sub> S | N/A                                      | N/A                                 | N/A                                                         | N/A                                                                                                                                        | C1[C@H]2[C@@H]([C@H]([C@H]([S1=O)C]CCCC(=O)O)NC(=O)N2                                 |
|                |                           |                           |                          | Cyclo(4-hydroxypropylphenylalanyl)                              | 260.29                        |                                  | N/A                                 | C <sub>14</sub> H <sub>16</sub> N <sub>2</sub> O <sub>3</sub>   | N/A(large conjugative system)            | <i>Menella kanisa</i>               | 10.1080/14786419.2013.879134                                | brine shrimp lethality                                                                                                                     | O=C(N1)[C@H]2N(C[C@H](O)C2)C([C@H]1CC3=CC=CC=C3)=O                                    |
|                |                           |                           |                          | methyl 2-(6-bromo-3,4-dihydroxyphenyl)acetate                   | 261.07                        | Natural Product Atlas, NPA000945 | N/A                                 | C <sub>9</sub> H <sub>9</sub> BrO <sub>4</sub>                  | 290                                      | <i>Aspergillus</i> sp.              | 10.1248/cpb.c12-01048                                       | significant radical scavenging activity against DPPH                                                                                       | COC(=O)CC1=CC(=C(C=C1Br)O)O                                                           |
| G5, G6         | 227.16 [M+H] <sup>+</sup> | 2.29                      | 232                      | cyclo-[L-(4-hydroxy-Pro)-L-Leu]                                 | 226.14                        | GNPS,CCMSLIB00000081185          | 0.86                                | N/A                                                             | N/A                                      | <i>Acremonium</i> sp.               | 10.1155/2021/9930210                                        | N/A                                                                                                                                        | N/A                                                                                   |
|                |                           |                           |                          | Euxanthone; 1,7-Dihydroxyxanthone                               | 228.2                         | Pubchem, 5281631                 | N/A                                 | C <sub>13</sub> H <sub>8</sub> O <sub>4</sub>                   | N/A(large conjugative system)            | <i>Aspergillus unguis</i>           | 10.3109/13880209.2010.494673                                | radical scavenging activity against DPPH, prevented the growth of <i>Mycobacterium smegmatis</i> , active on <i>M. tuberculosis</i> .      | C1=CC(=C2C(=C1)OC3=C(C2=O)C=C(C3=O)O                                                  |
|                |                           |                           |                          | Agglomerin F                                                    | 226.18                        | Dictionary of Natural Products,  | N/A                                 | C <sub>10</sub> H <sub>10</sub> O <sub>6</sub>                  | 248,280,314                              | <i>Aspergillus niger</i>            | 10.1002/cbic.201402172                                      | N/A                                                                                                                                        | COC(=O)CCC(=O)C1=C(C(=C)OC1=O)O                                                       |
|                |                           |                           |                          | Csypyrones B1                                                   | 226.18                        |                                  | N/A                                 | C <sub>10</sub> H <sub>10</sub> O <sub>6</sub>                  | 309,224                                  | <i>Aspergillus oryzae</i>           | 10.1016/j.bmc.2010.04.058                                   | N/A                                                                                                                                        | O=C1C(C(C)=O)=C(O)C=C(C(C(C)=O)O)O1                                                   |
|                |                           |                           |                          | Aspertamarinolide C                                             | 226.27                        | Natural Product Atlas, NPA032140 | N/A                                 | C <sub>12</sub> H <sub>18</sub> O <sub>4</sub>                  | conjugative double bond                  | <i>Aspergillus tamarii PSU-MF90</i> | 10.1016/j.tetlet.2020.152529                                | inactive in all bioassays.                                                                                                                 | CCCC[C@H]1[C@H]([C@H]([C@H]([C@H]1C(=O)O)C(=O)C(=O)OC                                 |
| G2             | 405.05 [M+H] <sup>+</sup> | 11.48                     | 240,247,272              | lovastatin                                                      | 404.27                        | GNPS, CCMSLIB000000839194        | 0.80                                | C <sub>24</sub> H <sub>36</sub> O <sub>5</sub>                  | 238                                      | <i>Aspergillus terreus</i>          | 10.1016/j.fct.2019.110585<br>10.1080/10826068.2020.1805624. | action in reducing blood lipid concentration, prevention of cancer and its neuroprotective, anti-inflammatory and antibacterial properties | O=C([C@H](CC)C)O[C@H]1[C@H]2C(C=C[C@H](C)[C@H]2CC[C@H]3OC([C@H](C3)O)=O)=C([C@H](C1)C |
|                |                           |                           |                          | 7-bromounguinol                                                 | 405.24                        | PubChem,146684023                | N/A                                 | C <sub>19</sub> H <sub>17</sub> BrO <sub>5</sub>                | 201,219,262,323                          | <i>Aspergillus unguis</i>           | 10.1039/c8ob00545a                                          | activity against the Gram-positive bacteria and reasonable selectivity over mammalian cells                                                | C/C=C(\C)/C1=C(C(=C(C2=C1OC3=C(C=CC(=C3)O)C)C(=O)O2)C)O)Br                            |
|                |                           |                           |                          | 7-bromounguinol                                                 | 405.24                        | Natural Product Atlas, NPA027773 | N/A                                 | C <sub>19</sub> H <sub>17</sub> BrO <sub>5</sub>                | 201,219,262,323                          | <i>Aspergillus unguis</i>           | 10.1039/c8ob00545a                                          | activity against the Gram-positive bacteria and reasonable selectivity over mammalian cells                                                | C/C=C(\C)/C1=C(C(=C(C2=C1OC3=C(C=CC(=C3)O)C)C(=O)O2)C)O)Br                            |

Table S2. Cont.

| Sample #                   | m/z measured                  | Mean retention time (min) | UV maximum measured (nm) | Compound name                                                                                                                                       | Molecular weight in Libraries | Library & ID                     | MS <sup>2</sup> similarity (cosine) | Molecular Formula                                             | UV maximum in libraries/ literature (nm) | Bioresource                           | DOI                          | Biological activity                                                                                                                      | SMILES code                                                                                 |
|----------------------------|-------------------------------|---------------------------|--------------------------|-----------------------------------------------------------------------------------------------------------------------------------------------------|-------------------------------|----------------------------------|-------------------------------------|---------------------------------------------------------------|------------------------------------------|---------------------------------------|------------------------------|------------------------------------------------------------------------------------------------------------------------------------------|---------------------------------------------------------------------------------------------|
| G6, G7                     | 487.29<br>[M+Na] <sup>+</sup> | 11.74                     | 247,276,313,366          | T-2 Toxin                                                                                                                                           | 466.50                        | GNPS,CCMSLIB00004681488          | 0.74                                | C <sub>24</sub> H <sub>34</sub> O <sub>9</sub>                | weak UV absorption                       | <i>Fusarium</i>                       | 10.1021/jf200767q            | Acute toxicity                                                                                                                           | CC1=CC2C(CC1OC(=O)CC(C)C)(C3(C(C(C34CO4)O2)O)OC(=O)C)COC(=O)C                               |
|                            |                               |                           |                          | (1'S)-6-O-methyl-7-bromoaverantin                                                                                                                   | 465.29                        | PubChem, 10458149                | N/A                                 | C <sub>21</sub> H <sub>21</sub> BrO <sub>7</sub>              | 224,289,320,445                          | <i>Aspergillus sp. SCSIO F063</i>     | 10.1021/np3002699            | no biological activity was found                                                                                                         | CCCCC[C@@H](C1=C(C=C2C(=C1O)C(=O)C3=C(C(=C(C=C3C2=O)OC)Br)O)O)O                             |
|                            |                               |                           |                          | Arisugacin E; 12α-Hydroxy, 1,2-didehydro, 3-ketone                                                                                                  | 466.56                        | Dictionary of Natural Products   | N/A                                 | C <sub>27</sub> H <sub>30</sub> O <sub>7</sub>                | 208,247,331                              | <i>Penicillium sp.</i>                | N/A                          | N/A                                                                                                                                      | N/A                                                                                         |
|                            |                               |                           |                          | 17-epi-notoamide M                                                                                                                                  | 465.55                        | Natural Product Atlas, NPA009865 | N/A                                 | C <sub>28</sub> H <sub>31</sub> N <sub>3</sub> O <sub>5</sub> | 231,250,278                              | <i>Aspergillus sp.</i>                | 10.1021/np300707x            | showed weak or no activity against these pathogenic bacteria, revealed selectivity toward <i>S. epidermidis</i>                          | CC1(C=CC2=C(O1)C=CC3=C2NC(=O)[C@@]3(C[C@H]4C(=O)N5CCC[C@@]5(C(=O)N4)O)C(C)C=C)C             |
| G2, G3, G6                 | 432.18<br>[M+H] <sup>+</sup>  | 8.14                      | 231,304                  | Isochromophilone VI                                                                                                                                 | 434.17                        | GNPS,CCMSLIB00005722749          | 0.76                                | C <sub>23</sub> H <sub>28</sub> ClNO <sub>5</sub>             | 235,345,370,485                          | <i>penicillium multicolor FO-3216</i> | 10.7164/antibiotics.48.696   | Antimicrobial and cytotoxic B-16 melanoma cells in vitro activities                                                                      | CC[C@H](C)\(C=C(C)\(C=C\ C1=CC2=C(C1)C(=O)[C@](C@)(OC(C)=O)C(=O)C2=CN1CCO                   |
|                            |                               |                           |                          | 6_,9_-Dihydroxy-14-p-nitrobenzoylcinnamolide                                                                                                        | 431.43                        | Pubchem, 101891076               | N/A                                 | C <sub>22</sub> H <sub>25</sub> NO <sub>8</sub>               | 254                                      | <i>Aspergillus ochraceus Jcm1F17</i>  | 10.1039/c3md00371j           | antiviral activities against H3N2 and EV71                                                                                               | C[C@@]1(CCC[C@]2([C@H]1[C@@H]([C@]3[C@@]2(COC3=O)O)O)C)COC(=O)C4=CC=C(C=C4)[N+](=O)[O-]     |
|                            |                               |                           |                          | Pseurotin A                                                                                                                                         | 431.43                        | Dictionary of Natural Products,  | N/A                                 | C <sub>22</sub> H <sub>25</sub> NO <sub>8</sub>               | 202,251,284                              | <i>Aspergillus sp.</i>                | 10.1038/ja.2008.99           | induction of cell differentiation, inhibition of chitin synthase, inhibition of monoamine oxidase, and apomorphine-antagonistic activity | CC/C=C/[C@@H]([C@@H](C1=C(C(=O)[C@@]2(O1)[C@H]([C@@]3NC2=O)(C(=O)C3=CC=CC(=O)O)O)O)O        |
|                            |                               |                           |                          | 6_,9_-dihydroxy-14-p-nitrobenzoylcinnamolide                                                                                                        | 431.43                        | Natural Product Atlas, NPA029851 | N/A                                 | C <sub>22</sub> H <sub>25</sub> NO <sub>8</sub>               | 254                                      | <i>Aspergillus ochraceus Jcm1F17</i>  | 10.1039/c3md00371j           | antiviral activities against H3N2 and EV71                                                                                               | C[C@@]1(CCC[C@]2([C@H]1[C@@H]([C@]3[C@@]2(COC3=O)O)O)C)COC(=O)C4=CC=C(C=C4)[N+](=O)[O-]     |
| G1, G2, G3, G4, G5, G6, G7 | 501.09<br>[M+Na] <sup>+</sup> | 13.14                     | 273,304,316,342          | Butanoic acid, 3-methyl-, 4-[(beta-D-glucopyranosyloxy)methyl]-1,4a,5,6,7,7a-hexahydro-6,7-dihydroxy-7-(hydroxymethyl)cyclopenta[c]pyran-1-yl ester | 478.50                        | GNPS,CCMSLIB00000850710          | 0.83                                | C <sub>21</sub> H <sub>34</sub> O <sub>12</sub>               | N/A                                      | N/A                                   | N/A                          | N/A                                                                                                                                      | CC(C)CC(=O)OC1C2C(CC(C2CO)O)O)C(=CO1)CO[C@H]3[C@H]([C@H]([C@@H]([C@H]([C@H]3O3)CO)O)O)O     |
|                            |                               |                           |                          | Fumitremorgin B                                                                                                                                     | 479.57                        | Pubchem, 105113                  | N/A                                 | C <sub>27</sub> H <sub>33</sub> N <sub>3</sub> O <sub>5</sub> | 226,278,295                              | <i>Aspergillus fumigatus</i>          | 10.1039/C39740000408         | N/A                                                                                                                                      | CC(=CCN1C2=C(C=CC(=C2)OC)C3=C1[C@@H](N4C(=O)C@H]5CCCN5C(=O)[C@@]4([C@H]3O)O)C=C(C)C)C       |
|                            |                               |                           |                          | Asnovolin C                                                                                                                                         | 478.62                        | Dictionary of Natural Products,  | N/A                                 | C <sub>27</sub> H <sub>42</sub> O <sub>7</sub>                | 270                                      | <i>Aspergillus novofumigatus</i>      | 10.1021/acs.jnatprod.6b00013 | fibronectin expression regulatory factors                                                                                                | C[C@H]1CC[C@H]([C@]1([C@]12[C@@]3([C@H]([C@@H]([C@]3O)C(=C3O2)C)C(=O)OC)C)C)CCC(=O)OC)C)C)O |
|                            |                               |                           |                          | Fumitremorgin B                                                                                                                                     | 477.57                        |                                  | N/A                                 | C <sub>27</sub> H <sub>31</sub> N <sub>3</sub> O <sub>5</sub> | 226,278,295                              | <i>Aspergillus fumigatus</i>          | 10.1039/C39740000408         | N/A                                                                                                                                      | CC(=CCN1C2=C(C=CC(=C2)OC)C3=C1[C@@H](N4C(=O)C@H]5CCCN5C(=O)[C@@]4([C@H]3O)O)C=C(C)C)C       |

Table S2. Cont.

| Sample #   | m/z measured                             | Mean retention time (min) | UV maximum measured (nm) | Compound name                                                                                             | Molecular weight in Libraries | Library & ID                     | MS <sup>2</sup> similarity (cosine) | Molecular Formula                                               | UV maximum in libraries/ literature (nm) | Bioresource                        | DOI                          | Biological activity                                                                                                                                                                    | SMILES code                                                                                                                                                              |
|------------|------------------------------------------|---------------------------|--------------------------|-----------------------------------------------------------------------------------------------------------|-------------------------------|----------------------------------|-------------------------------------|-----------------------------------------------------------------|------------------------------------------|------------------------------------|------------------------------|----------------------------------------------------------------------------------------------------------------------------------------------------------------------------------------|--------------------------------------------------------------------------------------------------------------------------------------------------------------------------|
|            |                                          |                           |                          | 29-N-demethylparaherquamide J                                                                             | 477.56                        | Natural Product Atlas, NPA012534 | N/A                                 | C <sub>27</sub> H <sub>31</sub> N <sub>3</sub> O <sub>5</sub>   | 225                                      | <i>Aspergillus duricaulis</i>      | 10.1021/acs.jnatprod.5b00508 | N/A                                                                                                                                                                                    | <chem>C[C@@H]1C[C@@@]23C[C@@H]4[C@@]1(C[C@@]5(C4(C)C)C6=C(C7=C(C(=C6)OC(C=CO7)(C)NC5=O)(CN2C1=O)NC3=O</chem>                                                             |
| G2, G5, G7 | 617.41 [M+H] <sup>+</sup>                | 14.22                     | 264,342,359              | Heme B / Porphyrin                                                                                        | 616.49                        | GNPS,CCMSLIB00000072119          | 0.82                                | C <sub>34</sub> H <sub>32</sub> FeN <sub>4</sub> O <sub>4</sub> | N/A (large conjugative system)           | N/A                                | 10.1073/pnas.0404349101      | inhibits Aβ aggregation in vitro and in vivo                                                                                                                                           | <chem>CC1=C(C2=CC3=C(C(=[N-]3)C=C4C(=C(C(=N4)C=C5C(=C(C(=N5)C=C1[N-]2)C=C(C)C)C=C(C)CCC(=O)O)CCC(=O)O.[Fe+2]</chem>                                                      |
|            |                                          |                           |                          | Phomoxanthone D                                                                                           | 616.57                        | Dictionary of Natural Products,  | N/A                                 | C <sub>30</sub> H <sub>32</sub> O <sub>14</sub>                 | 203,254,374                              | <i>Phomopsis</i> sp. xy21          | 10.3390/md14110215.          | No obvious inhibitory activity                                                                                                                                                         | <chem>C[C@H]1C[C@@H]([C@@]2(C(=O)C3=C(C(=CC(=C3O)C4=C(C5=C(C(=C4)O[C@]67C[C@]([C@@]6(C5=O)O)(C[C@@H]([C@@H]7O)C)O)O[C@]2([C@H]1O)CO)O</chem>                             |
|            |                                          |                           |                          | 19-hydroxypenitrem E                                                                                      | 615.76                        | Natural Product Atlas, NPA013252 | N/A                                 | C <sub>37</sub> H <sub>45</sub> NO <sub>7</sub>                 | 231,284                                  | <i>Aspergillus nidulans</i> EN-330 | 10.1016/j.phytol.2015.03.017 | exhibited cytotoxic activity against brine shrimp                                                                                                                                      | <chem>CC(=C)[C@@H]1[C@@H]([C@@H]([C@@H]2[C@@]3(O2)[C@@H](O1)CC[C@]4([C@@]3(CC[C@]5([C@@]4(C6=C7[C@H]5OC([C@H]8[C@H]9[C@@]8(C1=C(C(C9=C)C=CC(=C7)N6)O)(C)C)O)O)C)O</chem> |
| G4         | 755.37 [M+Na] <sup>+</sup>               | 3.93                      | 230                      | Cyclo(glycyltryptophylprolylglycylvalylglycyl-beta-hydroxytyrosyl)                                        | 732.31                        | GNPS,CCMSLIB00000855727          | 0.77                                | C <sub>36</sub> H <sub>44</sub> N <sub>6</sub> O <sub>9</sub>   | N/A                                      | N/A                                | N/A                          | N/A                                                                                                                                                                                    | <chem>CC(C)C1NC(=O)CNC(=O)C2CCCC2C(=O)C(CC3=C[NH]C4=CC=CC(=C4)NC(=O)CNC(=O)C(C(=O)CNC1=O)C(O)C5=CC=C(O)C=C5</chem>                                                       |
|            |                                          |                           |                          | Talapolyster F                                                                                            | 732.73                        | Natural Product Atlas, NPA008801 | N/A                                 | C <sub>36</sub> H <sub>44</sub> O <sub>16</sub>                 | N/A (large conjugative system)           | <i>Talaromyces flavus</i> .        | 10.1016/j.tet.2014.02.060    | N/A                                                                                                                                                                                    | <chem>CC(C)C[C@H]1C(=O)N2CCCC[C@H]2C(=O)N[C@H](C(=O)N([C@H](C(=O)N([C@H](C(=O)NCCCCC(=O)O1)CC3=C(C=CC(=C3)C)C(C)C)C4=CC=CC=C4</chem>                                     |
| G2, G3, G7 | 478.23 [M+H <sub>2</sub> O] <sup>+</sup> | 10.83                     | 255,273,322              | 4-[5-[[4-[5-[acetyl(hydroxyamino)pentylamino]-4-oxobutanoyl]-hydroxyamino]pentylamino]-4-oxobutanoic acid | 460.50                        | GNPS,CCMSLIB00000845585          | 0.75                                | C <sub>20</sub> H <sub>36</sub> N <sub>4</sub> O <sub>8</sub>   | N/A                                      | N/A                                | N/A                          | N/A                                                                                                                                                                                    | <chem>CC(=O)N(O)CCCCCNC(=O)CCC(=O)N(O)CCCCCNC(=O)CCC(O)=O</chem>                                                                                                         |
|            |                                          |                           |                          | Asnovolin D; 4-Deoxy, 4,14-didehydro, Me ester                                                            | 464.62                        | Dictionary of Natural Products,  | N/A                                 | C <sub>26</sub> H <sub>40</sub> O <sub>7</sub>                  | 270                                      | <i>Aspergillus novofumigatus</i>   | 10.1021/acs.jnatprod.6b00013 | N/A                                                                                                                                                                                    | <chem>C[C@H]1CC[C@H]([C@]1([C@]12[C@@]3([C@H]([C@@H](C(=O)C(=C3O2)C(C(=O)OC)C)C)CCC(=O)O)C(C)CO</chem>                                                                   |
|            |                                          |                           |                          | Aspergiodide A                                                                                            | 460.39                        |                                  | N/A                                 | C <sub>25</sub> H <sub>16</sub> O <sub>9</sub>                  | 203,235,307,431                          | <i>Aspergillus glaucus</i>         | 10.1016/j.tet.2006.11.074    | selective cytotoxicities against A-549, HL-60, BEL-7402, and P388 cell lines.                                                                                                          | <chem>CC1=CC(=CC(=C1C(C)O)C2=C3C4=C(C(=CC(=C4)O)C(=O)C5=C(C(=C(C(=C35)OC2=O)C)O)O</chem>                                                                                 |
|            |                                          |                           |                          | 7-bromofolipastatin                                                                                       | 459.33                        | Natural Product Atlas, NPA012534 | N/A                                 | C <sub>27</sub> H <sub>31</sub> N <sub>3</sub> O <sub>5</sub>   | 190,281                                  | <i>Aspergillus unguis</i>          | 10.1039/c8ob00545a           | antimicrobial activity against <i>Bacillus subtilis</i> (ATCC 6633); <i>Staphylococcus aureus</i> (ATCC 25923); <i>Saccharomyces cerevisiae</i> (ATCC 9763); <i>NS-1</i> (ATCC TIB-18) | <chem>CC=C(C)C1=CC(O)=C(C)C2=C1C(=O)OC1=C(O2)C(C(C)C)=C(C(Br)C(O)=C1C</chem>                                                                                             |
| G5, G6, G7 | 445.34 [M+H] <sup>+</sup>                | 10.56                     | 252,280                  | Lovastatin Sodium                                                                                         | 444.5                         | GNPS,CCMSLIB00000847300          | 0.70                                | C <sub>24</sub> H <sub>37</sub> NaO <sub>6</sub>                | N/A                                      | <i>Monascus</i> .                  | 10.1016/j.fct.2019.110585    | action in reducing blood lipid concentration, prevention of                                                                                                                            | <chem>CC[C@H](C)C(=O)O[C@H]1C[C@H](C=C2[C@H]1[C@H]([C@H](C=C2)C)C[C@H](C)C(=O)O)O)O)C.[Na+]</chem>                                                                       |

Table S2. Cont.

| Sample # | m/z measured | Mean retention time (min) | UV maximum measured (nm) | Compound name     | Molecular weight in Libraries | Library & ID                    | MS <sup>2</sup> similarity (cosine) | Molecular Formula                                             | UV maximum in libraries/ literature (nm) | Bioresource                  | DOI                            | Biological activity                                                            | SMILES code                                                                                                       |
|----------|--------------|---------------------------|--------------------------|-------------------|-------------------------------|---------------------------------|-------------------------------------|---------------------------------------------------------------|------------------------------------------|------------------------------|--------------------------------|--------------------------------------------------------------------------------|-------------------------------------------------------------------------------------------------------------------|
|          |              |                           |                          |                   |                               |                                 |                                     |                                                               |                                          |                              |                                | cancer and its neuroprotective, anti-inflammatory and antibacterial properties |                                                                                                                   |
|          |              |                           |                          | Fumiquinazoline A | 445.50                        | Pubchem                         | N/A                                 | C <sub>24</sub> H <sub>23</sub> N <sub>5</sub> O <sub>4</sub> | N/A                                      | <i>Aspergillus</i> sp.       | 10.1016/j.jia<br>c.2015.01.005 | No antibacterial activity                                                      | <chem>C[C@H]1C2=NC3=CC=CC=C3C(=O)N2[C@@H](C(=O)N1)C[C@]4([C@H]5N[C@H](C(=O)N5C6=CC=CC=C64)C)O</chem>              |
|          |              |                           |                          | Andibenin A       | 444.52                        | Dictionary of Natural Products, | N/A                                 | C <sub>25</sub> H <sub>32</sub> O <sub>7</sub>                | end absorption                           | <i>Aspergillus varicolor</i> | 10.1039/P19790002118           | N/A                                                                            | <chem>C[C@@]12C[C@H]3[C@@]([C@]4(CC[C@@]35[C@@]16COC(=O)[C@@H]6[C@@H](C@)(C5)(C2=O)C)O)C=CC(=O)OC4(C)C(C)O</chem> |
